# Supplementary material
Source: PubMed Central journal article supplement (PMC4205661)
Supplement: pnas.201412268SI.pdf [file pnas.201412268SI.pdf]

# Supporting Information

Cornelis et al. 10.1073/pnas.1412268111

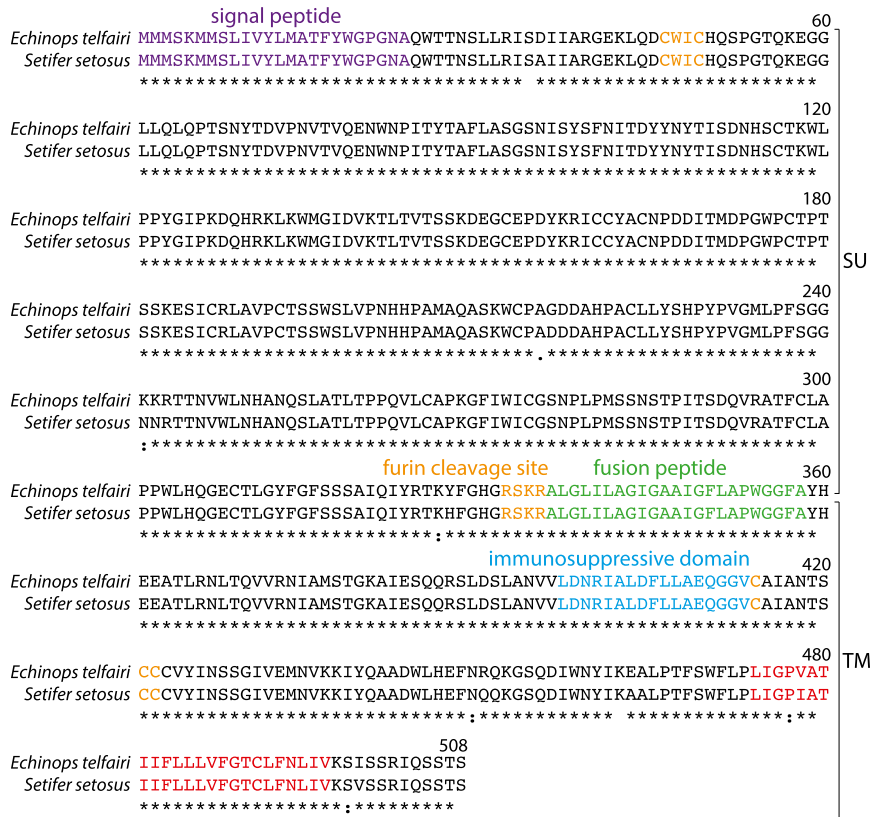

Fig. S1. Primary sequences and alignment of *Echinops telfairi* and *Setifer setosus* synctin-Ten1 (Syn-Ten1) proteins. Primary amino acid sequence and characteristic structural features of the orthologous envelope (env) proteins, including the putative furin cleavage site and immunosuppressive domain; the color code is as in Fig. 2; asterisks indicate amino acid identity, and colons indicate amino acid similarity. SU, surface subunit; TM, transmembrane subunit.

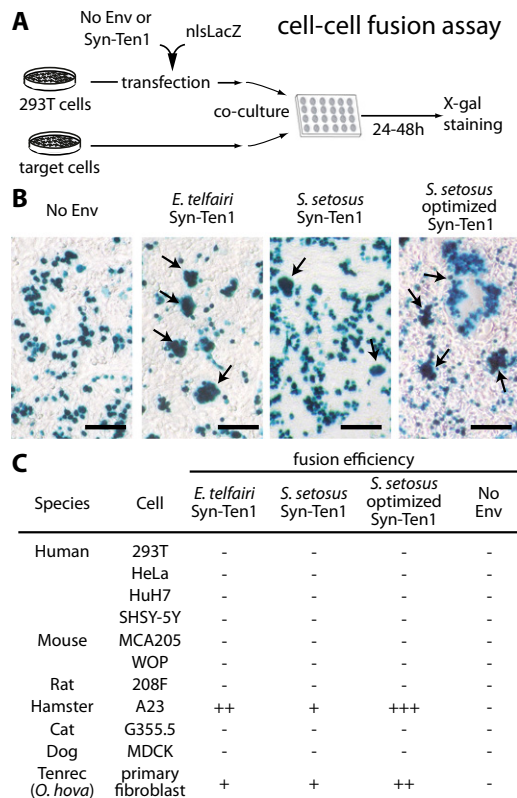

**Fig. 52.** Syncytin-Ten1 is a fusogenic retroviral env protein. (A) Schematic representation of the coculture assay for cell–cell fusion with *Syncytin-Ten1*. Human 293T cells were transfected with an expression vector for syncytin-Ten1 or with an empty vector (No Env) as a control and a plasmid expressing a nuclear  $\beta$ -galactosidase (nlsLacZ). After transfection, the 293T cells were cocultured with a panel of target cells and were stained with X-Gal 24–48 h later. (B) Syncytium formation (arrows) with *E. telfairi* and *S. setosus* Syn-Ten1, using A23 cells as the target (no syncytium formed with the No Env control). (Scale bars: 200  $\mu$ m.) (C) Fusogenic activity of *E. telfairi* and *S. setosus* Syn-Ten1 on the indicated target cells, including primary fibroblasts from the *Oryzoricetes hova* Tenrecidae species shown in Fig. 5. Experimental conditions were the same as in B. Fusion efficiency was determined as indicated in *Materials and Methods*, with the following scale: –, <5; +, 5–10; ++, 10–30; +++, >30.

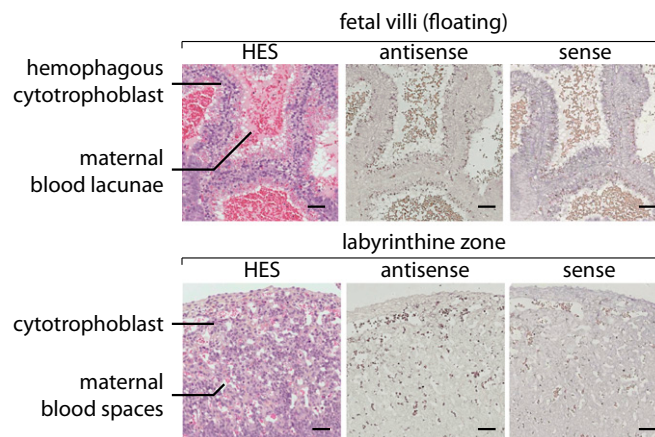

**Fig. 53.** Lack of *syncytin-Ten1* expression in the hemophagous cytotrophoblasts and the labyrinthine zone. Hematoxylin eosin saffron (HES) staining and in situ hybridization on the serial sections shown in Fig. 6 of the columnar hemophagous cytotrophoblasts of the central region (*Upper*) and of the labyrinthine zone of the placental pad (*Lower*). Experimental conditions were the same as in Fig. 6. Digoxigenin-labeled antisense or sense riboprobes are revealed with an alkaline phosphatase-conjugated anti-digoxigenin antibody. No signal was observed with either of the two probes. (Scale bars: 50  $\mu$ m.)

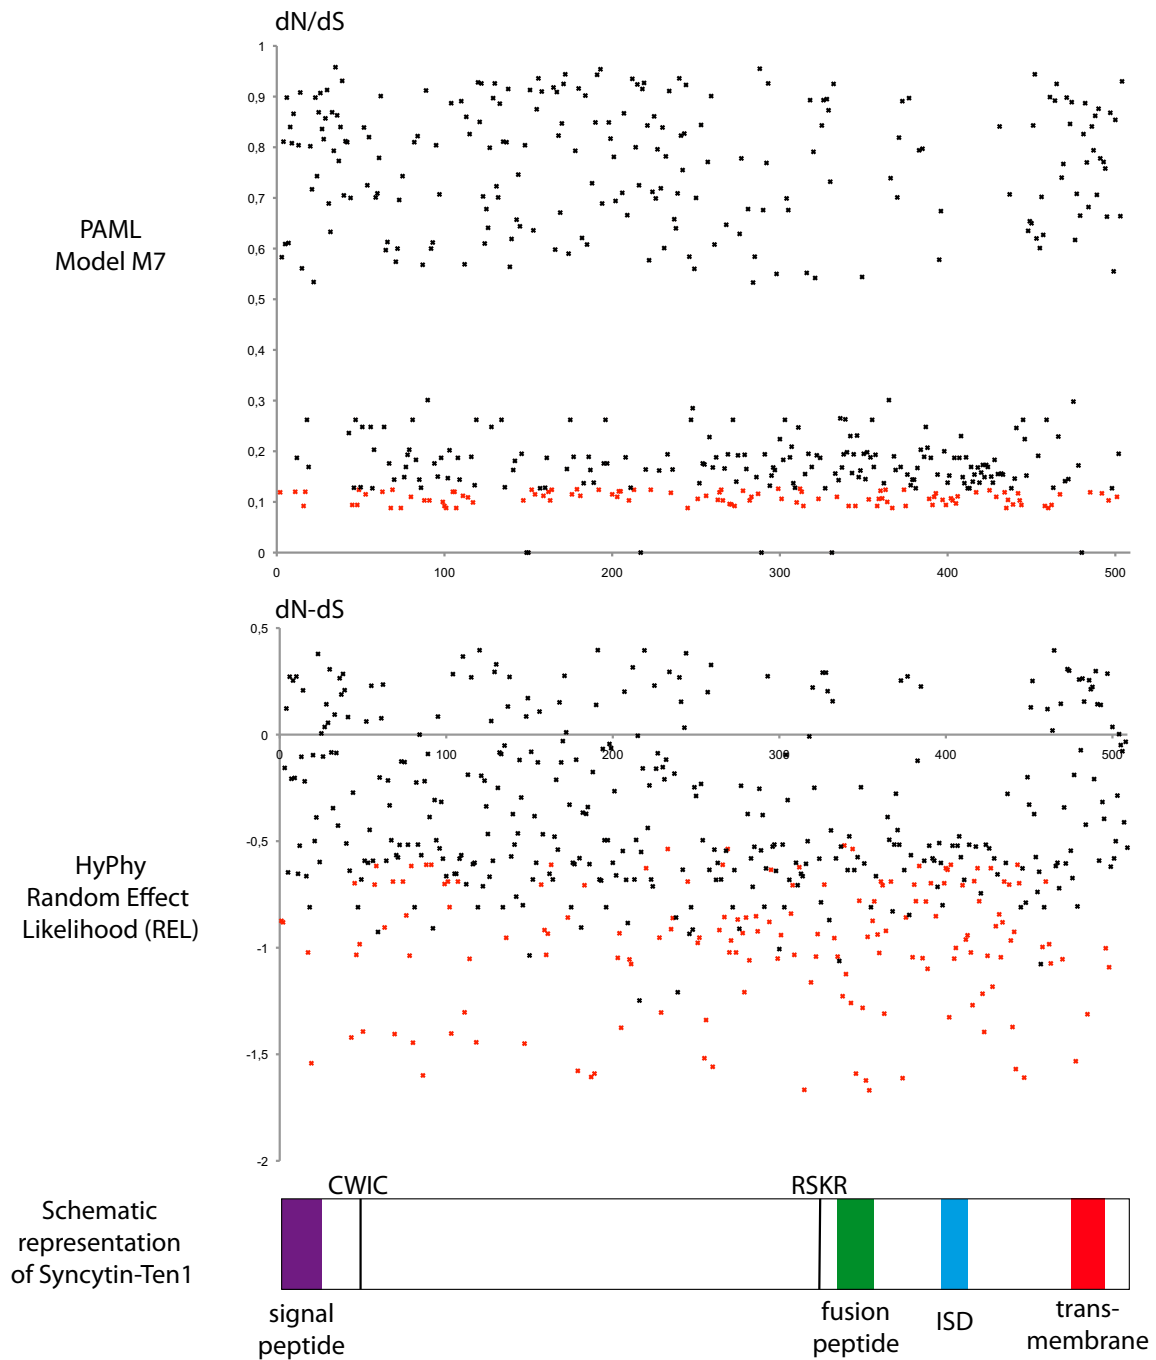

**Fig. S4.** Analysis of site-specific selections within *syncytin-Ten1*. Site-specific analysis of selection on *syncytin-Ten1* gene codons. Two independent analyses were performed using the phylogenetic analysis by the maximum likelihood (PAML) M7 model (Top) or the HyPhy random effect likelihood (REL) model (Middle) packages. The HyPhy package was run on the web server [www.datamonkey.org](http://www.datamonkey.org). The relevant indexes for selective pressure are provided for each codon. (Bottom) A schematic representation of syncytin-Ten1 protein domains with the conventions used in Fig. 2. At variance with the PAML model (M7), in which  $dS$  is estimated for the entire sequence, the HyPhy REL model estimates nonsynonymous mutations ( $dN$ ) and synonymous mutations ( $dS$ ) values independently for each codon, allowing the  $dS$  value to be null. Consequently, for the HyPhy model,  $dN - dS$  values are represented instead of  $dN/dS$  values. Significant values (probability  $\geq 0.95$ ) are represented in red; nonsignificant ones are represented in black. No model predicts codons to be significantly under positive selection (i.e.,  $dN/dS > 1$  or  $dN - dS > 0$ ). Moreover, no specific domain emerges, and in the HyPhy model weakly positive codons are distributed rather equally throughout the entire sequence, with the noticeable exception of the immunosuppressive domain within the transmembrane subunit.

**Table S1. Genomic coordinates for *E. telfairi* env protein-coding sequences**

| Env coding gene   | Scaffold no. | Strand orientation | Coordinates       |
|-------------------|--------------|--------------------|-------------------|
| <i>Ten-env1</i>   | JH980362     | –                  | 6222281–6223765   |
| <i>Tenv-env2</i>  | JH980315     | +                  | 5506373–5507719   |
| <i>Tenv-env3</i>  | AAIY02274049 | +                  | 508–1542          |
| <i>Ten-env4-1</i> | JH980293     | +                  | 31474421–31475623 |
| <i>Ten-env4-2</i> | JH981068     | +                  | 3358–4647         |
| <i>Ten-env5</i>   | JH980329     | +                  | 6614307–6616253   |
| <i>Ten-env6-1</i> | JH980338     | +                  | 9151416–9153191   |
| <i>Ten-env6-2</i> | JH980338     | –                  | 9265470–9267248   |
| <i>Ten-env7</i>   | JH980343     | –                  | 10358315–10359964 |

Scaffold number and coordinates are given according to the reference Tenrec genome (echTel2) from the University of California, Santa Cruz genome database ([http://genome-euro.ucsc.edu/cgi-bin/hgGateway?hgsid=197847906\\_BRNKiNWDwFbBcGBhcCnQJYmoqmgg&clade=mammal&org=Tenrec&db=0](http://genome-euro.ucsc.edu/cgi-bin/hgGateway?hgsid=197847906_BRNKiNWDwFbBcGBhcCnQJYmoqmgg&clade=mammal&org=Tenrec&db=0)).

**Table S2. Primers used in this study**

| Primer names                                                     | Primer sequences                    |
|------------------------------------------------------------------|-------------------------------------|
| To search for <i>E. telfairi</i> genes in <i>S. setosus</i>      |                                     |
| Full-length genes                                                |                                     |
| <i>Ten-Env1</i> -Full-F                                          | 5'-CTCATCGGTTAGATCTGAGTT            |
| <i>Ten-Env1</i> -Full-R                                          | 5'-ATTGCCAGGGAAGAGGAG               |
| <i>Ten-Env2</i> -Full-F                                          | 5'-TAAGCCCCCTAAAGCCGT               |
| <i>Ten-Env2</i> -Full-R                                          | 5'-GGGATGCTACTGGACCTG-T             |
| <i>Ten-Env3</i> -Full-F                                          | 5'-ATACCAGGTCAGTAAATCAGG            |
| <i>Ten-Env3</i> -Full-R                                          | 5'-AATAATACCAGCAGTACCAGGG           |
| <i>Ten-Env4</i> -Full-F                                          | 5'-CCGCGGAAGAAGCTAAAA               |
| <i>Ten-Env4</i> -Full-R                                          | 5'-GGGCAATCTCGTACATCTCT             |
| <i>Ten-Env5</i> -Full-F                                          | 5'-CCGGGAATGTGTGTGTTTT              |
| <i>Ten-Env5</i> -Full-R                                          | 5'-CCTTGCCATGTCCCTCC                |
| <i>Ten-Env6</i> -Full-F                                          | 5'-GTGCGACAGATTAAGAAGTG             |
| <i>Ten-Env6</i> -Full-R                                          | 5'-AATGTGCATCCTAAAAGCCTT            |
| <i>Ten-Env7</i> -Full-F                                          | 5'-AGACTGGCCCCGTCATATT              |
| <i>Ten-Env7</i> -Full-R                                          | 5'-GCTCCTCTGCGAGAAAAATG             |
| Internal fragments                                               |                                     |
| <i>Ten-Env2</i> -Int-F                                           | 5'-GGGAAGAACTAAAAGAGCAGTA           |
| <i>Ten-Env2</i> -Int-R                                           | 5'-GCTGTAAGTAAATCTCGACCTC           |
| <i>Ten-Env4</i> -Int-F                                           | 5'-GAAGTCTGCGCCGGTC                 |
| <i>Ten-Env4</i> -Int-R                                           | 5'-GAAACAACAAATCTAATCCTCG           |
| <i>Ten-Env5</i> -Int-F                                           | 5'-CATGGATTAATGGAAAGACC             |
| <i>Ten-Env5</i> -Int-R                                           | 5'-CTCTCATATTCTGCGTGACA             |
| For quantitative RT-PCR                                          |                                     |
| <i>RPL19</i> -F                                                  | 5'-GCTGTGGCAAGAAGAAAGT              |
| <i>RPL19</i> -R                                                  | 5'-GCCTAAGAAATGGACGGTCA             |
| <i>Ten-Env1</i> -qRT-PCR-F                                       | 5'-TGGATGGGTATTGATGTGAAA            |
| <i>Ten-Env1</i> -qRT-PCR-R                                       | 5'-GCTAGTCTGCATATGGATTCTT           |
| <i>Ten-Env2</i> -qRT-PCR-F                                       | 5'-GGGAAGAACTAAAAGAGCAGTA           |
| <i>Ten-Env2</i> -qRT-PCR-R                                       | 5'-GCTGTAAGTAAATCTCGACCTC           |
| <i>Ten-Env3</i> -qRT-PCR-F                                       | 5'-TAGATGGATGGTGGGCTTG              |
| <i>Ten-Env3</i> -qRT-PCR-R                                       | 5'-AGCTGGGGCCTGGTAATAA              |
| <i>Ten-Env5</i> -qRT-PCR-F                                       | 5'-CATGGATTAATGGAAAGACC             |
| <i>Ten-Env5</i> -qRT-PCR-R                                       | 5'-CTCTCATATTCTGCGTGACA             |
| <i>Ten-Env6</i> -qRT-PCR-F                                       | 5'-GATACTCAGTTTCCCTGGGC             |
| <i>Ten-Env6</i> -qRT-PCR-R                                       | 5'-CGCCATCAACCTTTTCTAAT             |
| <i>Ten-Env7</i> -qRT-PCR-F                                       | 5'-GGATGGCATGGAAGGATTAG             |
| <i>Ten-Env7</i> -qRT-PCR-R                                       | 5'-TCACGGTGTTCCTTATAC               |
| For 5' RACE                                                      |                                     |
| <i>Ten-Env1</i> -5'RACE-R                                        | 5'-CGCGTATCTCACTACTCCTCTCA          |
| For in situ hybridization                                        |                                     |
| <i>Ten-Env1</i> -ISH-1-F                                         | 5'-TTTTATTGGGGCCCTGGAA              |
| <i>Ten-Env1</i> -ISH-1-R                                         | 5'-AAGCATAGCAACAAATTCG              |
| <i>Ten-Env1</i> -ISH-2-F                                         | 5'-CCTTGCACTCCGACTTCTA              |
| <i>Ten-Env1</i> -ISH-2-R                                         | 5'-TGAAAAGCCAAAATAACCT              |
| <i>Ten-Env1</i> -ISH-3-F                                         | 5'-ACTTTGGCCACGGTAGATC              |
| <i>Ten-Env1</i> -ISH-3-R                                         | 5'-CAGAGGGAGGAACCAGCTAAA            |
| For amplification of <i>syncytin-Ten1</i> in Malagasy tenrecs    |                                     |
| <i>Syncytin-Ten1</i> locus F1                                    | 5'-CAGCTGATTCCTCTCATTTTGA           |
| <i>Syncytin-Ten1</i> locus R1                                    | 5'-TTGACACAACCTCCATGAATATA          |
| <i>Syncytin-Ten1</i> locus F2<br>( <i>5/6 Microgale</i> species) | 5'-CTGGTTTGTGATTTGGTGTCTC           |
| <i>Syncytin-Ten1</i> locus R2 ( <i>5/6 Microgale</i> species)    | 5'-TRGTATCATTAGGRTRRTACCCA          |
| <i>Syncytin-Ten1</i> ORF F1                                      | 5'-ATACATCTCGAGCTCWYRGTYAGATCTGAGTT |
| <i>Syncytin-Ten1</i> ORF R1                                      | 5'-ATACATACGCGTATTGCCAGGGAAGAGGAG   |
| <i>Syncytin-Ten1</i> ORF R2 ( <i>Micropotamogale</i> )           | 5'-TCACATTGCCAGGGAAGA               |
| <i>Syncytin-Ten1</i> internal F                                  | 5'-CCTCAAGTTCTTTGTGCTCC             |
| <i>Syncytin-Ten1</i> internal R                                  | 5'-AATTCRTGTAGCCAATCAGC             |

**Table S3. Origin of tissues used for genomic DNA extraction**

| Species                           | Provider                     | Institution                                                                                                        | Preservation condition |
|-----------------------------------|------------------------------|--------------------------------------------------------------------------------------------------------------------|------------------------|
| <i>Echinops telfairi</i>          | M. Milinkovitch              | Laboratory of Artificial and Natural Evolution, University of Geneva, Geneva                                       | Frozen                 |
| <i>Setifer setosus</i>            | M. Milinkovitch              | Laboratory of Artificial and Natural Evolution, University of Geneva, Geneva                                       | Frozen                 |
| <i>Tenrec ecaudatus</i>           | F. Catzeflis                 | Collection de Tissus de Mammifères de Montpellier, Montpellier                                                     | Ethanol                |
| <i>Hemicentetes semispinosus</i>  | S. Goodman<br>V. Soarimalala | Field Museum of Natural History, Chicago<br>Université d'Antananarivo, Département de Biologie Animale, Madagascar | EDTA                   |
| <i>Oryzoricetes tetradactylus</i> | S. Goodman<br>V. Soarimalala | Field Museum of Natural History, Chicago<br>Université d'Antananarivo, Département de Biologie Animale, Madagascar | EDTA                   |
| <i>Geogale aurita</i>             | S. Goodman<br>V. Soarimalala | Field Museum of Natural History, Chicago<br>Université d'Antananarivo, Département de Biologie Animale, Madagascar | EDTA                   |
| <i>Microgale brevicaudata</i>     | S. Goodman<br>V. Soarimalala | Field Museum of Natural History, Chicago<br>Université d'Antananarivo, Département de Biologie Animale, Madagascar | EDTA                   |
| <i>Microgale parvula</i>          | S. Goodman<br>V. Soarimalala | Field Museum of Natural History, Chicago<br>Université d'Antananarivo, Département de Biologie Animale, Madagascar | EDTA                   |
| <i>Microgale dobsoni</i>          | S. Goodman<br>V. Soarimalala | Field Museum of Natural History, Chicago<br>Université d'Antananarivo, Département de Biologie Animale, Madagascar | EDTA                   |
| <i>Microgale soricoides</i>       | S. Goodman<br>V. Soarimalala | Field Museum of Natural History, Chicago<br>Université d'Antananarivo, Département de Biologie Animale, Madagascar | EDTA                   |
| <i>Microgale gymnoryncha</i>      | S. Goodman<br>V. Soarimalala | Field Museum of Natural History, Chicago<br>Université d'Antananarivo, Département de Biologie Animale, Madagascar | EDTA                   |
| <i>Microgale thomasi</i>          | S. Goodman<br>V. Soarimalala | Field Museum of Natural History, Chicago<br>Université d'Antananarivo, Département de Biologie Animale, Madagascar | EDTA                   |
| <i>Micropotamogale lamottei</i>   | J. Decher                    | Zoologisches Forschungsmuseum Alexander Koenig, Bonn                                                               | Ethanol                |
| <i>Amblysomus hottentotus</i>     | F. Catzeflis                 | Collection de Tissus de Mammifères de Montpellier, Montpellier                                                     | Ethanol                |
| <i>Chrysochloris asiatica</i>     | F. Catzeflis                 | Collection de Tissus de Mammifères de Montpellier, Montpellier                                                     | Ethanol                |
| <i>Macroscelides proboscideus</i> | U. Zeller                    | Humbolt Universität, Berlin                                                                                        | Frozen                 |
